# Supplementary material for: Circulating extra-cellular RNAs and atrial fibrillation: data from the TRACE-CORE cohort
Source: Front Cardiovasc Med. 2025 Jul 15;12:1623112. doi: 10.3389/fcvm.2025.1623112 (PMC12303983; doi:10.3389/fcvm.2025.1623112)
Supplement: Supplementary file 1 [file Datasheet1.xlsx]

## Sheet: S1
Supplemental Table 1. TRACE-CORE exRNA Screen
Variable	N	Mean	Median	Std Dev	Minimum	Maximum
hsa_miR_1_3p	49	19.8811	20.3496	2.11948	7.97331	21.8112
hsa_miR_100_5p	91	18.6622	18.3855	1.90614	9.67063	21.9364
hsa_miR_101_3p	78	19.4129	19.7095	2.37813	6.96973	21.9652
hsa_miR_103a_3p	19	19.8235	20.3171	1.93612	13.5364	21.9852
hsa_miR_106b_3p	7	15.6988	20.4862	7.62581	3.90552	21.937
hsa_miR_106b_5p	73	19.6338	19.7813	1.72565	12.476	21.9695
hsa_miR_107	13	21.0282	21.0221	0.609976	19.7294	21.7927
hsa_miR_10a_5p	34	19.5182	20.3379	3.70488	5.23252	21.7797
hsa_miR_10b_5p	65	18.8102	19.0145	1.92764	10.5	21.9311
hsa_miR_1180_3p	48	20.415	20.7239	1.57075	10.902	21.9595
hsa_miR_1185_1_3p	8	17.7189	21.3166	5.83814	6.69	21.8768
hsa_miR_122_3p	18	20.149	20.2804	1.2308	17.9681	21.7554
hsa_miR_122_5p	120	17.6134	17.7122	2.42404	6.45332	21.8509
hsa_miR_1226_3p	34	20.2877	20.3718	1.17511	15.6961	21.9221
hsa_miR_1228_5p	9	18.165	20.7874	4.48681	10.8664	21.5935
hsa_miR_1229_3p	60	20.0934	20.6221	2.22884	5.35766	21.8929
hsa_miR_124_3p	75	19.1646	19.3474	2.15799	4.7374	21.8565
hsa_miR_1246	142	14.3677	14.4641	1.54637	10.0471	19.9061
hsa_miR_1247_5p	102	19.0788	19.4808	2.4664	4.6772	21.9002
hsa_miR_1249	31	19.8358	20.8142	3.73192	2.9852	21.8342
hsa_miR_1251_5p	4	13.2395	12.7643	7.39067	5.57014	21.8593
hsa_miR_125a_5p	122	18.8596	18.8253	1.26896	14.9939	21.939
hsa_miR_125b_5p	55	20.0682	20.1197	1.03177	17.5914	21.9498
hsa_miR_126_3p	128	17.6081	17.6025	1.69015	12.2618	21.6261
hsa_miR_126_5p	137	15.6831	15.4935	2.28701	9.37591	21.5979
hsa_miR_1260a	121	17.7382	17.6603	1.60205	13.3301	21.6995
hsa_miR_1260b	84	19.3594	19.6897	1.81075	7.8161	21.8804
hsa_miR_1271_5p	5	16.9166	21.6831	7.58859	4.56295	21.995
hsa_miR_128_3p	52	19.1573	19.6677	2.97554	4.38968	21.9654
hsa_miR_129_2_3p	6	17.8531	19.9264	4.81153	10.996	21.792
hsa_miR_129_5p	8	21.0719	21.241	0.814918	19.5135	21.8176
hsa_miR_1301_3p	142	18.0472	18.5314	2.04914	3.39247	21.9771
hsa_miR_1304_3p	10	16.1523	16.8854	6.40931	2.5	21.943
hsa_miR_1306_5p	62	18.2462	18.4554	2.64731	5.55428	21.8813
hsa_miR_1307_3p	42	19.7882	20.5901	2.91167	4.96871	21.9837
hsa_miR_1307_5p	8	19.3155	21.0574	3.25394	14.2529	21.9541
hsa_miR_130a_3p	66	19.9633	20.1841	1.417	11.9872	21.6277
hsa_miR_130b_3p	88	19.9777	20.0341	1.19294	15.6157	21.9712
hsa_miR_130b_5p	35	19.6615	20.6481	3.06532	4.34179	21.9962
hsa_miR_132_3p	31	19.7384	20.4958	3.10431	6.05831	21.8951
hsa_miR_133a_3p	10	16.2466	20.8831	7.77588	3.64202	21.8871
hsa_miR_134_5p	61	19.4801	20.3962	3.17754	6.6421	21.9211
hsa_miR_136_3p	5	21.3827	21.2914	0.371578	20.9126	21.8533
hsa_miR_136_5p	3	15.6818	20.417	9.45023	4.80005	21.8282
hsa_miR_139_5p	89	19.7365	19.8218	1.3252	15.5666	21.9462
hsa_miR_140_3p	85	19.4816	19.8044	2.19038	5.96887	21.9123
hsa_miR_140_5p	15	18.6837	20.8933	4.73327	7.69161	21.9531
hsa_miR_141_3p	8	16.7777	19.275	5.87112	5.34971	21.7773
hsa_miR_142_3p	40	19.1888	20.3863	3.62851	2.5	21.763
hsa_miR_142_5p	71	18.5801	18.5269	1.49191	11.3069	21.9956
hsa_miR_143_3p	71	19.56	19.606	0.865792	17.7605	21.3977
hsa_miR_144_3p	49	19.5187	20.4196	3.21072	3.56968	21.9189
hsa_miR_144_5p	50	19.748	20.0493	2.65523	2.69485	21.9432
hsa_miR_145_3p	48	19.1566	19.2474	1.20769	15.7889	21.6662
hsa_miR_145_5p	42	20.2441	20.3972	1.079	17.0029	21.9876
hsa_miR_146a_5p	104	17.9971	18.2654	2.22228	5.85915	21.9667
hsa_miR_146b_5p	73	19.6434	19.917	1.36734	15.0925	21.9157
hsa_miR_148a_3p	99	18.6466	18.8015	1.70132	13.139	21.9923
hsa_miR_148b_3p	96	18.6848	18.7066	1.64848	13.9955	21.9687
hsa_miR_150_5p	124	16.4547	16.3258	2.11167	9.5565	21.9907
hsa_miR_151a_3p	107	17.3754	17.5751	2.74042	11.8134	21.871
hsa_miR_151a_5p	53	19.9159	20.1621	1.4365	14.9024	21.9732
hsa_miR_151b	76	19.7454	20.0722	1.47789	14.7003	21.9055
hsa_miR_152_3p	65	18.4467	18.2467	2.45643	4.7819	21.8087
hsa_miR_1537_3p	10	19.587	20.9184	4.93693	5.59963	21.8046
hsa_miR_154_3p	23	19.7563	20.6742	2.83883	9.23618	21.6707
hsa_miR_155_5p	11	20.8847	21.3022	1.02112	18.9894	21.8252
hsa_miR_15a_5p	18	21.1884	21.5767	0.776876	19.6087	21.9732
hsa_miR_15b_3p	76	19.4833	19.5134	1.35695	15.4066	21.9589
hsa_miR_15b_5p	118	16.9487	16.8639	2.30897	4.75253	21.729
hsa_miR_16_2_3p	67	20.0491	20.0866	1.17235	17.0414	21.9984
hsa_miR_16_5p	127	16.8208	16.6329	2.12201	12.3772	21.7711
hsa_miR_17_3p	20	19.3661	20.5875	4.2601	2.99912	21.731
hsa_miR_17_5p	88	19.2773	19.308	1.76747	11.2178	21.9538
hsa_miR_181a_2_3p	15	19.6222	20.3091	2.31068	12.8601	21.8208
hsa_miR_181a_3p	93	19.1679	19.3748	1.46756	14.1744	21.8814
hsa_miR_181a_5p	8	19.4821	21.0279	2.97492	14.3656	21.742
hsa_miR_181b_5p	46	20.3364	20.4204	1.08411	17.756	21.9583
hsa_miR_181c_3p	68	20.3479	20.3278	0.916571	17.2708	21.9584
hsa_miR_181c_5p	23	17.362	19.604	4.85449	5.90811	21.8748
hsa_miR_181d_5p	17	19.0736	21.0678	5.23981	4.97121	21.8919
hsa_miR_182_5p	21	20.0216	20.6342	2.96883	7.38236	21.4894
hsa_miR_183_5p	30	19.3242	20.4294	3.52168	3.3183	21.9863
hsa_miR_185_3p	6	18.3993	21.2707	6.81897	4.55853	21.7869
hsa_miR_185_5p	65	20.3566	20.4972	1.05224	16.8751	21.9946
hsa_miR_186_5p	60	20.1984	20.3023	1.11247	17.4228	21.9817
hsa_miR_18a_5p	35	19.4345	20.4957	3.86812	2.5	21.9235
hsa_miR_18b_5p	11	21.0848	21.1568	0.512348	20.3909	21.9572
hsa_miR_190a_3p	17	19.6424	20.2679	2.7887	10.8346	21.9602
hsa_miR_191_5p	100	18.1367	18.3689	1.91548	12.8587	21.9394
hsa_miR_192_5p	59	19.9569	19.987	1.07216	18.0115	21.9096
hsa_miR_193a_3p	2	20.6438	20.6438	0.801152	20.0773	21.2103
hsa_miR_193a_5p	52	20.5292	20.9421	1.33437	13.8815	21.9742
hsa_miR_193b_3p	8	21.117	21.3208	0.751347	19.7412	21.8412
hsa_miR_194_5p	34	19.5718	20.2367	3.36864	4.888	21.954
hsa_miR_195_5p	136	16.8856	16.8191	2.12649	11.977	21.9845
hsa_miR_197_3p	110	19.8066	19.8805	1.25269	14.9412	21.9897
hsa_miR_199a_3p_hsa_miR_199b_3p	92	18.6758	18.9343	2.62755	4.69787	21.6627
hsa_miR_199a_5p	19	20.125	20.9272	2.53969	10.2907	21.7554
hsa_miR_199b_5p	23	18.3899	20.4464	4.38036	8.43738	21.4301
hsa_miR_19a_3p	105	18.0565	17.9364	1.61856	13.8926	21.9894
hsa_miR_19b_3p	122	17.7056	17.7924	1.44345	13.7172	21.9268
hsa_miR_200a_3p	6	18.4122	21.3645	6.73584	4.76996	21.7677
hsa_miR_200b_3p	19	20.4164	21.1335	1.86683	13.9371	21.9172
hsa_miR_200c_3p	12	20.76	21.0308	1.24965	17.7857	21.9571
hsa_miR_203a	50	18.1045	17.8104	1.52752	13.2401	21.4865
hsa_miR_204_5p	26	20.4495	20.7367	1.11228	17.0496	21.5099
hsa_miR_205_5p	3	21.5495	21.5559	0.0591736	21.4874	21.6052
hsa_miR_206	20	20.0332	21.0246	2.53527	12.8202	21.9727
hsa_miR_20a_5p	90	18.572	18.6317	2.2304	3.94767	21.9001
hsa_miR_20b_5p	91	18.3967	18.8779	2.80255	3.6144	21.921
hsa_miR_21_3p	7	19.8394	20.9997	2.67078	14.5389	21.6256
hsa_miR_21_5p	133	15.0605	14.7705	2.37641	4.12451	21.6775
hsa_miR_210_3p	30	20.7552	20.9904	1.05509	16.8227	21.9766
hsa_miR_2110	36	20.2781	20.7175	2.04644	9.69515	21.9292
hsa_miR_212_3p	9	21.134	21.7953	1.20305	18.9261	21.9953
hsa_miR_214_3p	28	19.4692	20.3223	2.14899	14.5885	21.8021
hsa_miR_215_5p	27	19.0949	20.1569	4.59334	2.03077	21.9823
hsa_miR_216b_5p	10	19.7611	20.2313	1.90917	15.9449	21.6878
hsa_miR_22_3p	106	19.2818	19.5526	1.62969	11.5992	21.9911
hsa_miR_22_5p	31	19.8063	20.4281	1.9695	13.6345	21.8893
hsa_miR_221_3p	121	18.3937	18.5343	1.69505	12.9158	21.9911
hsa_miR_221_5p	12	18.134	20.5665	5.19222	7.04589	21.9781
hsa_miR_222_3p	100	18.9105	19.068	1.61346	12.7591	21.7209
hsa_miR_223_3p	122	15.1054	14.9357	2.32786	9.63987	21.8378
hsa_miR_223_5p	58	19.4783	20.1762	2.96345	2.2387	21.8568
hsa_miR_224_5p	43	20.3794	20.7212	1.31515	16.121	21.9496
hsa_miR_2355_5p	12	15.8423	20.2285	7.25123	3.86087	21.9912
hsa_miR_23a_3p	122	17.2461	17.2012	1.89584	12.0391	21.8515
hsa_miR_23b_3p	76	19.4746	19.7129	1.91394	7.90181	21.9911
hsa_miR_24_2_5p	7	16.1999	19.995	6.54502	4.97851	21.9225
hsa_miR_24_3p	100	18.5984	18.6212	1.66302	13.5827	21.9768
hsa_miR_25_3p	127	15.9618	15.621	2.19865	9.52474	21.9642
hsa_miR_26a_5p	121	17.5729	17.33	1.93084	11.15	21.9931
hsa_miR_26b_5p	125	17.7096	17.8084	1.76958	11.9373	21.8085
hsa_miR_27a_3p	108	18.4409	18.6614	2.48418	2.5	21.8293
hsa_miR_27b_3p	105	19.0534	19.1538	1.56861	11.2405	21.8463
hsa_miR_28_3p	143	9.62924	9.9466	3.59593	3.78758	17.8325
hsa_miR_28_5p	24	19.8568	21.2392	4.04114	2.5	21.9055
hsa_miR_296_5p	77	16.8291	15.2608	3.41256	8.75282	21.9634
hsa_miR_29a_3p	100	18.4594	18.8302	2.56926	2.5	21.9572
hsa_miR_29b_3p	52	20.3054	20.476	1.03593	17.3417	21.8927
hsa_miR_29c_3p	70	19.4033	19.4339	1.29552	16.1761	21.5076
hsa_miR_29c_5p	143	17.3859	17.9988	1.77121	13.4583	20.8908
hsa_miR_301a_3p	8	16.3584	19.7229	6.72941	4.81794	21.3477
hsa_miR_301b_3p	28	18.8534	20.2765	4.1466	8.58467	21.9797
hsa_miR_30a_3p	58	19.9993	20.227	1.45458	13.9937	21.9591
hsa_miR_30a_5p	118	18.5655	18.7053	1.56138	13.4494	21.8417
hsa_miR_30b_5p	61	19.375	19.9958	2.88054	6.22272	21.9422
hsa_miR_30c_5p	93	19.3017	19.5813	2.2259	2.5	21.9941
hsa_miR_30d_5p	92	19.0322	19.2267	2.21427	3.6264	21.9914
hsa_miR_30e_3p	64	19.62	20.1752	1.63046	14.7647	21.6942
hsa_miR_30e_5p	90	18.73	18.7338	1.54257	14.4942	21.5874
hsa_miR_31_3p	2	10.0695	10.0695	9.17822	3.57954	16.5595
hsa_miR_3158_3p	6	17.2195	18.8561	5.45881	9.86264	21.9325
hsa_miR_32_5p	50	18.3814	18.7736	2.67526	3.91843	21.992
hsa_miR_320a	133	17.4393	17.5022	1.49852	13.3845	20.8988
hsa_miR_320b	143	12.8098	12.9154	1.46306	9.85949	17.0355
hsa_miR_320c	50	20.1554	20.6112	1.73175	11.7863	21.9958
hsa_miR_320d	18	21.1312	21.3301	0.719323	19.9386	21.9687
hsa_miR_323a_3p	37	19.8912	20.252	2.5272	6.06908	21.9984
hsa_miR_324_3p	107	19.4513	19.2231	1.34604	15.9047	21.9097
hsa_miR_324_5p	47	20.5597	20.5674	0.808919	19.2574	21.9937
hsa_miR_326	13	19.1378	20.7278	4.72227	8.32729	21.871
hsa_miR_329_3p	62	20.6342	20.6478	0.720318	18.3877	21.827
hsa_miR_330_3p	17	18.6167	20.7728	4.65591	4.82138	21.9884
hsa_miR_331_3p	51	17.1746	16.8793	1.61338	14.2838	21.7068
hsa_miR_335_3p	21	19.9513	20.6997	3.43286	5.84593	21.9817
hsa_miR_335_5p	70	19.8601	20.0606	1.43178	15.1717	21.9439
hsa_miR_337_3p	20	19.3032	19.8395	1.95104	13.1701	21.7693
hsa_miR_337_5p	9	15.8323	19.3605	7.05237	5.74402	21.8271
hsa_miR_338_3p	13	19.9684	21.4647	3.7031	8.88091	21.9938
hsa_miR_338_5p	26	19.674	20.6467	3.6839	5.54097	21.871
hsa_miR_339_3p	70	18.6879	18.7865	2.16434	4.5425	21.8312
hsa_miR_339_5p	142	16.4002	17.648	2.68924	8.64679	21.9414
hsa_miR_33a_3p	18	19.8529	20.7165	3.63702	5.87033	21.9936
hsa_miR_33a_5p	5	16.0283	19.6078	7.0678	7.76835	21.9901
hsa_miR_340_3p	22	20.8833	20.878	0.763823	18.5175	21.9133
hsa_miR_340_5p	44	19.9837	20.4236	1.79474	14.7406	21.9937
hsa_miR_342_3p	104	18.733	18.8731	2.02152	4.76635	21.8162
hsa_miR_342_5p	12	19.6325	21.4427	4.81021	4.84836	21.9198
hsa_miR_345_5p	9	20.0141	21.3876	3.83322	9.92702	21.7914
hsa_miR_34a_3p	20	20.8126	21.2561	1.71647	13.9657	21.9696
hsa_miR_34a_5p	8	19.9734	20.542	1.47545	16.8046	21.3671
hsa_miR_34c_5p	14	16.2187	19.9106	6.59731	3.97735	21.9954
hsa_miR_361_3p	33	19.7279	20.2202	2.80294	5.09781	21.8349
hsa_miR_361_5p	58	20.2692	20.6098	1.22617	16.6779	21.9496
hsa_miR_3613_3p	107	18.5482	18.6736	1.65119	13.7344	21.8923
hsa_miR_3615	86	20.2916	20.4089	0.981733	15.7731	21.9605
hsa_miR_362_3p	17	19.0545	21.0385	4.60355	4.7262	21.8726
hsa_miR_363_3p	13	16.7475	20.617	6.53141	3.83487	21.9855
hsa_miR_365a_3p_hsa_miR_365b_3p	44	19.8981	19.9974	1.14416	17.7371	21.9828
hsa_miR_369_3p	14	19.2266	20.3983	4.32254	4.89599	21.8833
hsa_miR_374a_5p	51	19.0696	19.9304	3.42815	3.43449	21.9768
hsa_miR_374b_5p	56	19.6408	19.913	1.8304	11.3318	21.9142
hsa_miR_375	48	20.0572	20.4941	2.02738	11.1219	21.9884
hsa_miR_376a_3p	16	19.8842	20.3354	1.67414	15.8174	21.8318
hsa_miR_376b_3p	116	19.7048	19.8321	1.937	3.53795	21.9672
hsa_miR_376c_3p	11	20.4466	20.3636	0.847522	19.0873	21.7601
hsa_miR_377_3p	7	13.4547	16.6763	7.60507	3.4957	21.8823
hsa_miR_378a_3p	70	19.8427	19.7803	0.945565	17.2579	21.86
hsa_miR_378a_5p	32	18.3375	19.9721	4.69319	3.48943	21.9967
hsa_miR_380_3p	4	17.6295	21.0525	7.09862	6.99153	21.4214
hsa_miR_381_3p	5	19.9338	19.6767	1.6508	17.8641	21.7245
hsa_miR_382_3p	43	20.3379	20.5625	1.06502	17.9574	21.9677
hsa_miR_409_3p	39	19.4015	19.9435	2.81016	4.46129	21.772
hsa_miR_409_5p	9	16.433	20.0485	6.97825	4.62883	21.9726
hsa_miR_411_3p	5	11.9176	7.93138	8.66552	4.11288	21.8388
hsa_miR_423_3p	25	20.0454	20.5993	1.5667	15.3608	21.492
hsa_miR_423_5p	134	17.1234	17.0289	1.60344	12.5674	21.8813
hsa_miR_424_3p	10	19.3712	20.8929	5.47981	3.89926	21.8928
hsa_miR_424_5p	71	19.7659	19.8813	1.37456	13.8574	21.9954
hsa_miR_425_3p	39	20.4623	20.7344	1.80662	10.9976	21.9805
hsa_miR_425_5p	29	19.615	20.2564	2.34556	11.8487	21.9401
hsa_miR_432_5p	61	19.9072	19.8027	1.46674	12.7196	21.9154
hsa_miR_433_3p	103	19.01	19.7506	2.36561	7.77536	21.9881
hsa_miR_4429	95	19.9374	19.9427	1.1506	16.4321	21.9874
hsa_miR_4433a_5p	78	19.5034	19.6993	1.34095	13.4863	21.7688
hsa_miR_4433b_3p	12	18.521	21.44	6.69531	3.63913	21.9558
hsa_miR_4433b_5p	126	17.4921	17.5228	2.19414	3.35867	21.8241
hsa_miR_4446_3p	135	17.8349	17.9197	2.13721	13.4913	21.9538
hsa_miR_450b_5p	23	18.8911	20.5586	4.61369	4.37028	21.9043
hsa_miR_451a	129	16.0753	15.7426	2.23158	11.5209	21.6601
hsa_miR_452_5p	6	20.823	20.9895	1.03882	19.0673	21.8724
hsa_miR_454_3p	25	18.8714	20.2745	4.53634	4.49112	21.9846
hsa_miR_454_5p	17	16.0058	19.6774	6.4062	4.03865	21.9945
hsa_miR_4732_5p	44	20.4505	20.5608	1.22545	14.9291	21.9078
hsa_miR_4770	19	17.6247	20.1518	5.70413	5.24589	21.6608
hsa_miR_483_3p	24	18.8746	21.0753	5.43439	4.31928	21.9699
hsa_miR_483_5p	36	20.3908	20.385	0.81832	18.8039	21.8472
hsa_miR_484	119	18.9266	18.9122	1.45265	15.0229	21.9727
hsa_miR_485_3p	76	19.1407	19.2531	1.12296	12.9127	21.8331
hsa_miR_486_3p	69	19.7828	19.8983	1.15236	16.6901	21.966
hsa_miR_486_5p	143	13.1584	12.7094	2.25679	9.67508	19.5644
hsa_miR_487a_3p	2	21.8407	21.8407	0.181379	21.7124	21.9689
hsa_miR_487b_3p	50	20.0877	20.3619	1.31935	14.0519	21.7056
hsa_miR_494_3p	12	18.0163	20.5126	5.46843	4.88456	21.9686
hsa_miR_495_3p	52	19.5664	20.113	1.79603	11.8291	21.9887
hsa_miR_496	9	19.58	20.8556	4.87229	6.65952	21.9745
hsa_miR_497_5p	33	19.5975	19.9272	2.23865	8.92261	21.8514
hsa_miR_499a_3p	6	17.1015	17.2162	4.45134	11.803	21.8505
hsa_miR_500a_3p	21	20.6841	20.9148	0.842314	18.7229	21.8825
hsa_miR_501_3p	18	16.5283	20.66	7.20025	3.55918	21.9285
hsa_miR_502_3p	19	20.4588	21.0773	3.06176	7.94107	21.7928
hsa_miR_503_5p	22	18.202	20.8668	5.58525	4.29613	21.9949
hsa_miR_505_3p	34	20.1696	20.5738	1.28247	16.99	21.7455
hsa_miR_505_5p	15	20.1356	20.7334	2.73927	10.4127	21.9914
hsa_miR_518e_5p_hsa_miR_519a_5p_	45	19.5469	20.694	3.76496	3.26323	21.9858
hsa_miR_5193	44	19.3416	19.604	2.35483	5.5	21.7553
hsa_miR_520c_3p	1	20.677	20.677	.	20.677	20.677
hsa_miR_532_3p	105	19.0062	19.5533	2.11145	12.5228	21.9925
hsa_miR_532_5p	29	19.3681	20.6276	4.37655	4.46281	21.9631
hsa_miR_542_3p	143	17.9173	18.7537	1.85734	12.6652	20.6396
hsa_miR_543	37	19.7291	20.4029	2.38331	9.80184	21.8156
hsa_miR_545_3p	4	14.6705	15.4068	7.01316	5.9891	21.8793
hsa_miR_545_5p	9	14.8397	19.8159	7.52153	3.94362	21.8445
hsa_miR_548d_3p	14	21.0124	20.8055	0.55444	20.3334	21.9425
hsa_miR_548e_3p	11	14.1036	17.0914	7.60105	2.5	21.7206
hsa_miR_550a_3p	3	15.7327	21.7063	10.5858	3.51028	21.9815
hsa_miR_551b_3p	37	19.3433	20.0782	3.25689	7.28239	21.9996
hsa_miR_552_3p	34	19.4015	19.9054	2.66859	5.61249	21.4424
hsa_miR_558	5	13.2724	12.9292	7.8882	3.42726	21.2138
hsa_miR_564	8	20.0976	20.1416	1.47442	17.9167	21.9737
hsa_miR_574_3p	40	19.467	20.2775	2.79072	4.67972	21.9833
hsa_miR_576_5p	38	19.6385	20.3052	2.76471	9.79441	21.9749
hsa_miR_579_3p	48	16.8678	16.7244	1.82175	10.4342	21.3903
hsa_miR_582_3p	8	15.2369	16.5742	5.8796	4.74875	21.6907
hsa_miR_582_5p	7	16.7474	20.1866	6.28415	5.15452	21.9286
hsa_miR_584_5p	83	19.4538	19.8292	2.65117	2.5	21.9775
hsa_miR_589_5p	15	16.9525	18.1519	5.3537	4.78829	21.9431
hsa_miR_590_3p	8	18.9681	19.5806	2.32408	13.7586	21.1527
hsa_miR_590_5p	14	17.7684	20.1244	5.79587	6.52039	21.9263
hsa_miR_596	8	20.8332	20.8835	0.57859	19.7353	21.6639
hsa_miR_598_3p	54	20.9921	21.0824	0.653668	18.8479	21.9988
hsa_miR_613	9	15.1953	19.6704	7.15781	5.36465	21.929
hsa_miR_616_5p	6	18.4494	19.2561	3.87686	10.8414	21.6069
hsa_miR_624_5p	4	20.7414	20.6589	0.384617	20.4262	21.2216
hsa_miR_625_3p	72	20.1206	20.1803	1.16408	16.5175	21.9968
hsa_miR_625_5p	64	19.7038	19.6506	0.84915	17.4214	21.6637
hsa_miR_627_5p	9	17.3223	19.4502	5.71991	3.98799	21.6191
hsa_miR_628_3p	143	19.0135	19.0068	1.1683	15.2391	21.88
hsa_miR_629_5p	40	20.5542	20.5326	0.822166	18.6674	21.9659
hsa_miR_642a_5p	8	12.656	9.78326	6.17547	5.35609	21.0467
hsa_miR_651_5p	15	18.2543	20.5	4.71464	5.77812	21.9978
hsa_miR_6511b_3p	62	20.206	20.3136	1.1755	16.6135	21.929
hsa_miR_652_3p	91	17.7721	17.6093	3.09172	4.30324	21.8873
hsa_miR_652_5p	66	20.2524	20.2484	0.858797	18.7551	21.9797
hsa_miR_654_3p	18	17.4784	18.3538	4.73568	5.95039	21.9944
hsa_miR_654_5p	15	20.8032	21.2665	1.28484	18.3495	21.9851
hsa_miR_656_3p	101	17.4443	16.3745	2.44191	9.35847	21.9512
hsa_miR_659_3p	24	21.0391	21.0567	0.593281	19.6809	21.9219
hsa_miR_660_5p	44	20.0791	20.6077	2.31185	6.69058	21.9007
hsa_miR_664a_3p	40	20.1251	20.4667	2.10507	8.77537	21.9851
hsa_miR_664a_5p	18	21.0633	21.323	0.933963	19.0663	21.9868
hsa_miR_664b_3p	34	19.7421	20.5924	3.40339	5.34272	21.9868
hsa_miR_6803_3p	20	20.2094	20.6811	2.48627	10.5	21.9669
hsa_miR_7_1_3p	29	19.1797	19.9537	3.1623	7.24915	21.4901
hsa_miR_7_5p	47	20.1785	20.1631	0.976827	17.8196	21.9876
hsa_miR_744_5p	90	19.6756	19.9252	1.39074	14.7272	21.9792
hsa_miR_766_3p	91	20.5543	20.7576	1.10796	16.8361	21.9783
hsa_miR_769_5p	55	19.9078	20.3179	2.04124	11.21	21.9793
hsa_miR_7977	27	20.6064	20.7921	0.934589	17.8934	21.8804
hsa_miR_877_3p	46	19.5702	19.8685	2.19864	6.19178	21.5823
hsa_miR_877_5p	13	20.5147	20.6263	1.12951	18.4825	21.9617
hsa_miR_885_5p	35	19.7754	20.7145	2.74165	9.73414	21.9897
hsa_miR_9_3p	40	19.5699	20.0387	1.91273	11.5105	21.8028
hsa_miR_92a_3p	126	15.0443	14.4971	2.3811	10.0745	21.9781
hsa_miR_92b_3p	109	17.7851	17.7998	1.44454	13.8574	21.2697
hsa_miR_93_3p	15	15.8726	20.1436	6.71072	4.28308	21.5735
hsa_miR_93_5p	71	19.6637	19.8494	1.31734	15.8199	21.7465
hsa_miR_941	12	16.686	20.1816	7.04814	3.9875	21.9921
hsa_miR_942_5p	42	20.5805	20.7456	1.09937	17.5313	21.9687
hsa_miR_95_3p	30	20.7048	20.7667	0.992562	17.0238	21.9963
hsa_miR_96_5p	6	11.1089	7.49623	7.7304	4.77211	21.9492
hsa_miR_98_3p	21	20.7431	20.7853	0.856478	18.9302	21.9493
hsa_miR_98_5p	35	20.4135	20.6314	0.899579	16.908	21.6326
hsa_miR_99a_5p	101	18.4031	17.9333	1.61491	15.7954	21.8843
hsa_miR_99b_5p	24	19.5568	20.3289	2.58857	8.86771	21.9551

## Sheet: S2
Supplemental Table 2. miR associated with number of echocardiographic phenotypes
MiRNA	count of number of significant Echo parameter hits
hsa_miR_1_3p	1
hsa_miR_10a_5p	4
hsa_miR_10b_5p	4
hsa_miR_1185_1_3p	1
hsa_miR_1229_3p	1
hsa_miR_1246	1
hsa_miR_1247_5p	2
hsa_miR_1271_5p	1
hsa_miR_128_3p	2
hsa_miR_1307_3p	1
hsa_miR_139_5p	2
hsa_miR_144_5p	1
hsa_miR_152_3p	1
hsa_miR_17_3p	1
hsa_miR_17_5p	1
hsa_miR_181c_3p	1
hsa_miR_185_3p	1
hsa_miR_186_5p	1
hsa_miR_190a_3p	3
hsa_miR_193b_3p	2
hsa_miR_194_5p	1
hsa_miR_200b_3p	1
hsa_miR_200c_3p	2
hsa_miR_210_3p	1
hsa_miR_2110	1
hsa_miR_215_5p	1
hsa_miR_22_3p	1
hsa_miR_22_5p	2
hsa_miR_224_5p	1
hsa_miR_296_5p	2
hsa_miR_29a_3p	2
hsa_miR_29b_3p	1
hsa_miR_29c_3p	1
hsa_miR_29c_5p	1
hsa_miR_301b_3p	1
hsa_miR_30b_5p	1
hsa_miR_30c_5p	1
hsa_miR_320d	2
hsa_miR_324_3p	1
hsa_miR_331_3p	2
hsa_miR_337_3p	1
hsa_miR_342_5p	2
hsa_miR_34a_3p	2
hsa_miR_3615	2
hsa_miR_378a_3p	1
hsa_miR_381_3p	2
hsa_miR_425_5p	3
hsa_miR_4446_3p	1
hsa_miR_450b_5p	1
hsa_miR_454_3p	1
hsa_miR_4770	1
hsa_miR_483_3p	1
hsa_miR_497_5p	1
hsa_miR_502_3p	1
hsa_miR_532_3p	1
hsa_miR_532_5p	1
hsa_miR_545_5p	1
hsa_miR_548d_3p	1
hsa_miR_548e_3p	1
hsa_miR_550a_3p	1
hsa_miR_574_3p	3
hsa_miR_582_3p	1
hsa_miR_584_5p	1
hsa_miR_590_3p	1
hsa_miR_590_5p	1
hsa_miR_642a_5p	1
hsa_miR_654_3p	1
hsa_miR_654_5p	1
hsa_miR_659_3p	2
hsa_miR_660_5p	1
hsa_miR_664a_5p	1
hsa_miR_6803_3p	1
hsa_miR_7977	1
hsa_miR_877_3p	1
hsa_miR_885_5p	2
hsa_miR_9_3p	2
hsa_miR_99a_5p	1
